# Supplementary material
Source: ML conference proceedings conference paper supplement (https://aclanthology.org/D19-1574)
Supplement: Attachment [file D19-1574.Attachment.zip]

## Appendix of “Working Hard or Hardly Working: Challenges of Integrating Typology into Neural Dependency Parsers”

### A Dependency Relations for Deriving the Liu Directionalities

Among all the 37 relation types defined in Universal Dependencies, we select the top-20 relations sorted by the number of languages in which the specific type appears, as listed in Table 1. For relation types that are missing in a specific language, we simply put its value (directionality) as 0.5.

---

*cc, conj, case, nsubj, nmod, dobj, mark,*  
*advcl, amod, advmod, neg, nummod, xcomp,*  
*ccomp, cop, acl, aux, punct, det, appos,*  
*iobj, dep, csubj, parataxis, mwe, name,*  
*nsubjpass, compound, auxpass, csubjpass,*  
*vocative, discourse*

---

Table 1: Subset of universal dependency relations used for deriving the Liu directionalities.

### B Feature Templates for Selective Sharing

We use the same set of selective sharing feature templates (Table 2) as [Täckström et al. \(2013\)](#).

---

$d \otimes w.81A \otimes \mathbb{1}[h.p=VERB \wedge m.p=NOUN]$   
 $d \otimes w.81A \otimes \mathbb{1}[h.p=VERB \wedge m.p=PRON]$   
 $d \otimes w.85A \otimes \mathbb{1}[h.p=NOUN \wedge m.p=ADP]$   
 $d \otimes w.86A \otimes \mathbb{1}[h.p=PRON \wedge m.p=ADP]$   
 $d \otimes w.87A \otimes \mathbb{1}[h.p=NOUN \wedge m.p=ADJ]$

---

Table 2: Arc-factored feature templates for selective sharing. Arc direction:  $d \in \{\text{LEFT}, \text{RIGHT}\}$ ; Part-of-speech tag of head / modifier:  $h.p / m.p$ . WALS features:  $w.X$  for  $X=81A$  (order of Subject, Verb and Object), 85A (order of Adposition and Noun), 86A (order of Genitive and Noun), 87A (order of Adjective and Noun).

### C Training details

To train our baseline parser and its typology-augmented variants, we use ADAM ([Kingma and Ba, 2015](#)) with a learning rate of  $1e-3$  for 200K updates (2M when using GD). We use a batch size of 500 tokens. Early stopping is also employed, based on the validation set in the training languages. Following [Dozat and Manning \(2017\)](#), we use a 3-layered bidirectional LSTM with a hidden size of 400. The hidden sizes of the MLPs for predicting arcs and dependency relations are 500 and 100, respectively.

Our baseline model shares all parameters across languages. During training, we truncate each training treebank to a maximum of 500K tokens for efficiency. Batch updates are composed of examples derived from a single language, and are sampled uniformly, such that the number of per-language updates are proportional to the size of each language’s treebank. following ([Wang and Eisner, 2018](#)), when training on GD, we sample a batch from a real language with probability 0.2, and a batch of GD data otherwise.

For *fine-tune*, we perform 100 SGD updates with no early-stopping. When using K-Means to obtain language clusters, we set  $K = 5$ , based on cross-validation.

### D LAS Results

Table 3 summarizes the LAS scores corresponding to Table 1 in the paper.

| Language   | B*    | +T <sub>S</sub> * | Our Baseline | Selective Sharing  | +T <sub>L</sub>    | +T <sub>D</sub> | +T <sub>S</sub>    | Fine-tune |
|------------|-------|-------------------|--------------|--------------------|--------------------|-----------------|--------------------|-----------|
| Basque     | 27.07 | 31.46             | 34.64        | 34.79              | 36.49              | 36.83           | 34.90              | 43.04     |
| Croatian   | 48.68 | 52.29             | 61.34        | 61.41 <sup>†</sup> | 59.86              | 63.72           | 61.60              | 65.07     |
| Greek      | 50.10 | 56.73             | 56.51        | 56.53 <sup>†</sup> | 55.16              | 60.18           | 56.59 <sup>†</sup> | 64.66     |
| Hebrew     | 49.71 | 53.29             | 41.15        | 41.05              | 43.58              | 43.63           | 41.50              | 43.14     |
| Hungarian  | 42.85 | 47.73             | 32.65        | 33.43              | 34.14              | 32.01           | 33.07              | 44.26     |
| Indonesian | 39.46 | 47.63             | 47.17        | 48.21              | 51.82              | 50.78           | 49.22              | 62.23     |
| Irish      | 39.06 | 40.75             | 39.63        | 39.60 <sup>†</sup> | 43.02              | 42.14           | 40.24              | 48.58     |
| Japanese   | 37.57 | 40.6              | 43.32        | 43.69              | 47.67              | 48.10           | 42.85              | 60.59     |
| Slavonic   | 40.03 | 43.95             | 57.35        | 57.40 <sup>†</sup> | 56.89              | 56.69           | 57.19              | 53.88     |
| Persian    | 30.06 | 24.6              | 35.72        | 35.59              | 32.85              | 39.78           | 34.93              | 49.72     |
| Polish     | 50.08 | 54.85             | 61.67        | 61.57              | 64.69              | 57.20           | 61.71              | 65.68     |
| Romanian   | 50.90 | 53.42             | 55.77        | 56.21              | 55.99 <sup>†</sup> | 59.28           | 56.48              | 59.12     |
| Slovenian  | 57.09 | 61.48             | 70.86        | 70.01              | 70.44              | 70.03           | 70.29              | 73.81     |
| Swedish    | 55.35 | 58.42             | 67.24        | 67.40              | 66.92              | 68.03           | 67.04              | 68.65     |
| Tamil      | 28.39 | 37.81             | 33.81        | 34.57              | 34.96              | 36.61           | 34.70              | 47.46     |
| AVG        | 43.09 | 47.00             | 49.26        | 49.43              | 50.30              | 51.00           | 49.49              | 56.66     |

Table 3: LAS results corresponding to Table 1 in the paper. Results with differences that are statistically *insignificant* compared to the baseline are marked with <sup>†</sup> (arc-level paired permutation test with  $p \geq 0.05$ ).

## E Rules for Deriving Corpus-specific WALS Features

Table 4 summarizes the rules we used to derive corpus-specific WALS features. The values are determined by the dominance of directionalities, e.g., if  $\frac{\#\{\curvearrowright\}}{\#\{\curvearrowright\} + \#\{\curvearrowleft\}} > \delta$ , then its typological feature is set to the right-direction value, vice versa. In-between values are set to *Mixed*. In our experiments,  $\delta = 0.75$ .

| WALS ID | Condition                                                                                                                                      | Values                                                                                                   |
|---------|------------------------------------------------------------------------------------------------------------------------------------------------|----------------------------------------------------------------------------------------------------------|
| 82A     | $\text{relation} \in \{\text{nsubj}, \text{csubj}\} \wedge \text{h.p}=\text{VERB} \wedge (\text{m.p}=\text{NOUN} \vee \text{m.p}=\text{PRON})$ | $\text{VS}(\curvearrowright), \text{SV}(\curvearrowright), \text{Mixed}$                                 |
| 83A     | $\text{relation} \in \{\text{dobj}, \text{iobj}\} \wedge \text{h.p}=\text{VERB} \wedge (\text{m.p}=\text{NOUN} \vee \text{m.p}=\text{PRON})$   | $\text{VO}(\curvearrowright), \text{OV}(\curvearrowright), \text{Mixed}$                                 |
| 85A     | $(\text{h.p}=\text{NOUN} \vee \text{h.p}=\text{PRON}) \wedge \text{m.p}=\text{ADP}$                                                            | $\text{Prepositions}(\curvearrowright), \text{Postpositions}(\curvearrowright)$                          |
| 86A     | $\text{h.p}=\text{NOUN} \wedge \text{m.p}=\text{NOUN}$                                                                                         | $\text{Noun-Genitive}(\curvearrowright), \text{Genitive-Noun}(\curvearrowright), \text{Mixed}$           |
| 87A     | $\text{h.p}=\text{NOUN} \wedge \text{m.p}=\text{ADJ}$                                                                                          | $\text{Adjective-Noun}(\curvearrowright), \text{Noun-Adjective}(\curvearrowright), \text{Mixed}$         |
| 88A     | $\text{relation} \in \{\text{det}\} \wedge \text{m.p}=\text{DET}$                                                                              | $\text{Demonstrative-Noun}(\curvearrowright), \text{Noun-Demonstrative}(\curvearrowright), \text{Mixed}$ |

Table 4: Rules for determining the dependency arc set of each specific WALS feature type. The arc direction specified in the parenthesis of each value indicates the global directional tendency of the corresponding typological feature.

## F Examples of Mismatching between WALS and Corpus Statistics

Table 5 shows some examples of mismatching between WALS and corpus statistics. Substantial variations exist for some typological features, and for UD v1.2 in several cases, the dominant word order specified by linguists is questionable or even reversed (cf. Arabic subject-verb order).

| Language | WALS |                           | UD                       |                         |
|----------|------|---------------------------|--------------------------|-------------------------|
|          | ID   | Value                     | $\#\{\curvearrowright\}$ | $\#\{\curvearrowleft\}$ |
| Arabic   | 82A  | SV ( $\curvearrowleft$ )  | 4,875                    | 2,489                   |
| Czech    | 82A  | SV ( $\curvearrowleft$ )  | 13,925                   | 32,510                  |
| Czech    | 83A  | VO ( $\curvearrowleft$ )  | 37,034                   | 20,246                  |
| Spanish  | 83A  | VO ( $\curvearrowleft$ )  | 10,745                   | 6,119                   |
| Finnish  | 86A  | G-N ( $\curvearrowleft$ ) | 6,010                    | 8,134                   |

Table 5: Example of mismatching between WALS and arc directionalities collected from UD v1.2. G-N is short for Genitive-Noun.

## References

- Timothy Dozat and Christopher D. Manning. 2017. Deep Biaffine Attention for Neural Dependency Parsing. In *ICLR*.
- Diederik P Kingma and Jimmy Ba. 2015. Adam: A method for stochastic optimization. In *ICLR*.
- Oscar Täckström, Ryan McDonald, and Joakim Nivre. 2013. Target language adaptation of discriminative transfer parsers. In *NAACL*, pages 1061–1071, Atlanta, Georgia. Association for Computational Linguistics.
- Dingquan Wang and Jason Eisner. 2018. Surface statistics of an unknown language indicate how to parse it. *TACL*, 6:667–685.
